# Supplementary material for: Exciplex host coupled with a micro-cavity enabling high efficiency OLEDs with narrow emission profile
Source: Royal Society of Chemistry journal article supplement (doi:10.1039/d1tc05978e), 2022-01-01
Supplement: d1tc05978e1.pdf [file d1tc05978e1.pdf]

## Supporting Information

### **Exciplex host coupled with micro-cavity enabling high efficiency OLEDs with narrow emission profile**

By *Ya Wen*<sup>‡,1</sup>, *Ya-Kun Wang*<sup>‡\*,1</sup>, *Jun-Gui Zhou*<sup>,1</sup>, *Jiao-Yang Li*<sup>,1</sup>, *Wei He*<sup>,1</sup>, *Yi-Jie Zhang*<sup>,1</sup>, *Xiao-Zhao Zhu*<sup>,1,3</sup>, *Liang-Sheng Liao*<sup>\*,1,2,3</sup>, *Man-Keung Fung*<sup>\*1,2,3</sup>

#### **Device Fabrication**

In prior to the fabrication of Ex-Te OLEDs, ITO/Ag/ITO anodes were deposited by magnetron sputtering under a vacuum of  $10^{-3}$  Pa. A 10-nm-thick ITO layer was prepared under Ar and O<sub>2</sub> atmosphere on a glass substrate using a DC power and a sputtering pressure of 100 W and 0.5 Pa, respectively. A 100-nm-thick Ag layer was prepared under Ar atmosphere on the bottom ITO layer using a RF power and a sputtering pressure of 200 W and 2 Pa, respectively. The bottom-emitting OLEDs were fabricated on the ITO coated glass substrates. The ITO glasses were ultrasonically cleaned by deionized water and ethanol for 10 minutes subsequently, and then exposed to UV-ozone for 15 minutes. The active area of each device is 9 mm<sup>2</sup>. All organic materials and metal layers were deposited by thermal evaporation under a vacuum of  $10^{-6}$  Torr. The deposition rate of HAT-CN and Liq was 0.2 Å/s. The deposition rate of other organic layers was 2-3 Å/s. The deposition rate of Al and Yb:Ag was 5-6 and 2 Å/s, respectively. The doping rate was monitored with a quartz crystal monitor (QCM).

#### **Measurement and characterization**

The current density–voltage–luminance (J–V–L) characteristics, electroluminescence spectra and efficiencies of the devices were measured by a Suzhou F-star Scientific Instrument. The photoluminescence spectra were obtained by a Hitachi F-4600 fluorescence spectrophotometer. The surface roughness of the cathode was analyzed by a Veeco MultiMode V atomic force microscopy. The transmittance and reflectance of the electrodes were measured by a Perkin Elmer Lambda 750 spectrophotometer. The sheet resistance of the electrodes was measured by a Suzhou Jingge ST2258A four-point probe tester. The refractive index, extinction coefficient and film thickness of layers were measured by a J.A. Woollam Co., Inc. Alpha-SE ellipsometer with the angle of incidence at 70°.

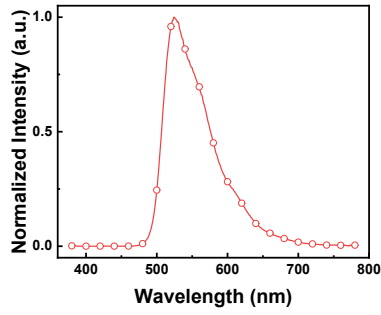

**Figure S1.** Normalized EL spectrum of the Ref-Be device.

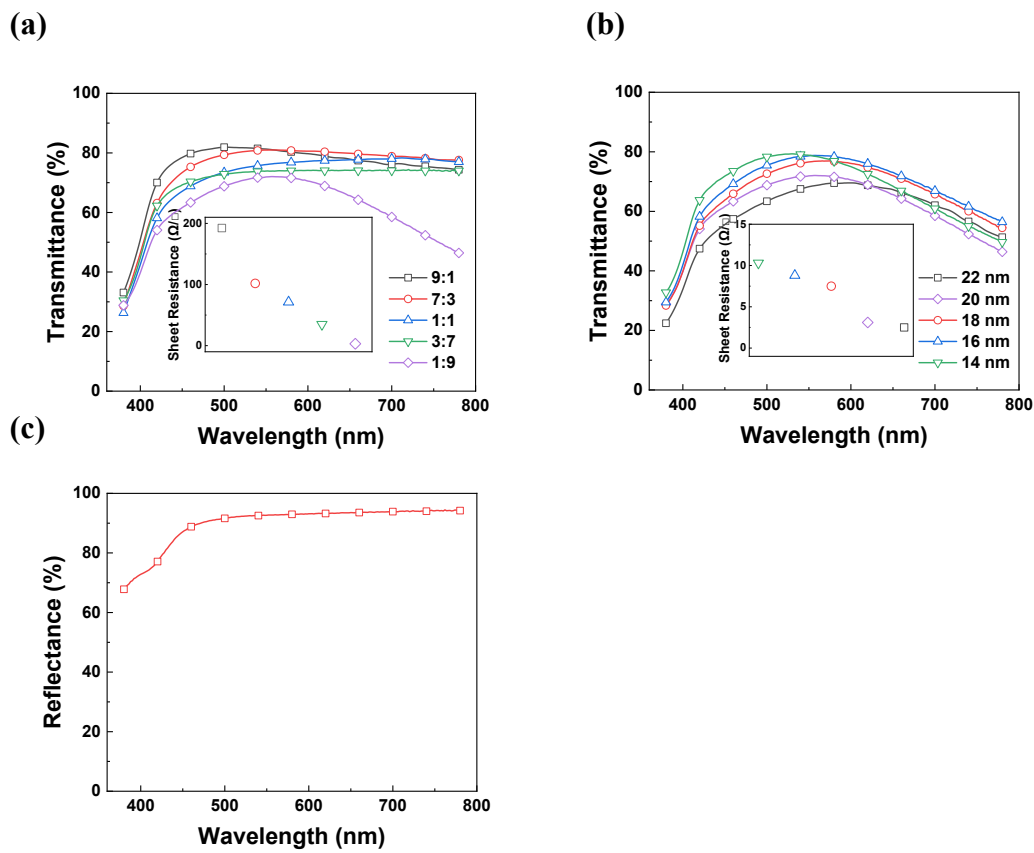

**Figure S2.** (a) Transmittance and sheet resistance (inset) of co-deposited 20 nm thick Yb:Ag alloy with different volume ratios. (b) Transmittance and sheet resistance (inset) of Yb:Ag alloy with different thicknesses at a volume ratio of 1:9. (c) Reflectance of ITO/Ag/ITO anode.

**Table S1.** Summary of the transmittance and sheet resistance of Yb:Ag alloy with different volume ratios and thicknesses.

| Ratio | Thickness (nm) | Transmittance @ 524 nm (%) | Sheet Resistance ( $\Omega/\square$ ) |
|-------|----------------|----------------------------|---------------------------------------|
|-------|----------------|----------------------------|---------------------------------------|

|     |    |      |       |
|-----|----|------|-------|
| 9:1 |    | 81.7 | 192.4 |
| 7:3 |    | 80.4 | 101.8 |
| 1:1 | 20 | 75.0 | 71.3  |
| 3:7 |    | 73.6 | 34.8  |
| 1:9 |    | 70.9 | 3.1   |
|     | 22 | 66.2 | 2.7   |
|     | 20 | 70.9 | 3.1   |
| 1:9 | 18 | 75.1 | 7.5   |
|     | 16 | 77.7 | 8.8   |
|     | 14 | 79.2 | 10.3  |

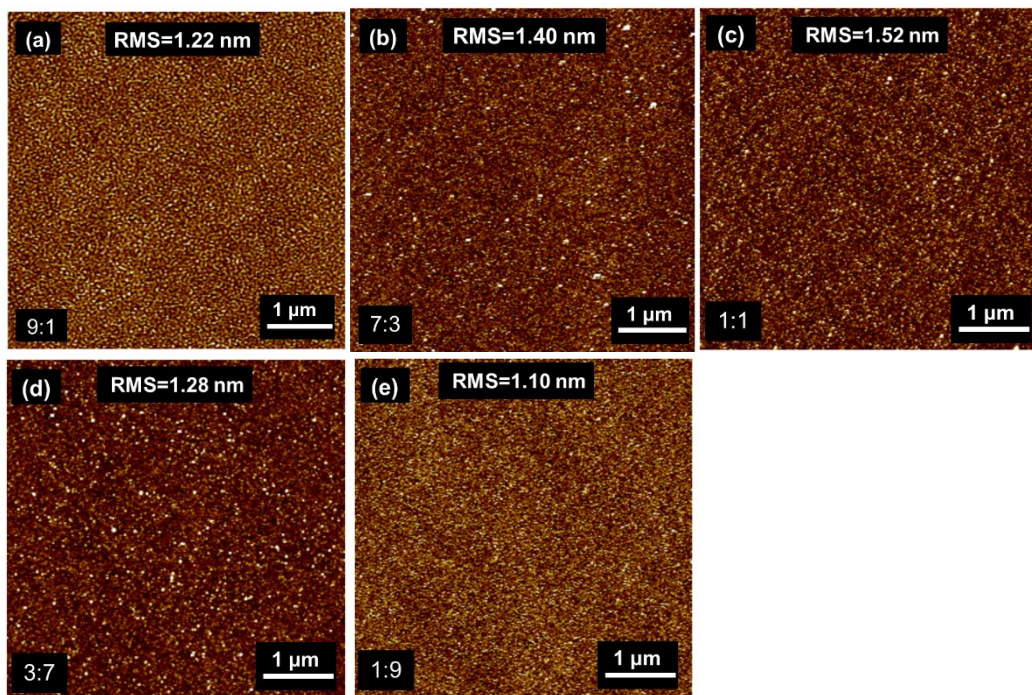

**Figure S3.** Atomic force microscope (AFM) images of Yb:Ag alloy with different volume ratios.

(a)

(b)

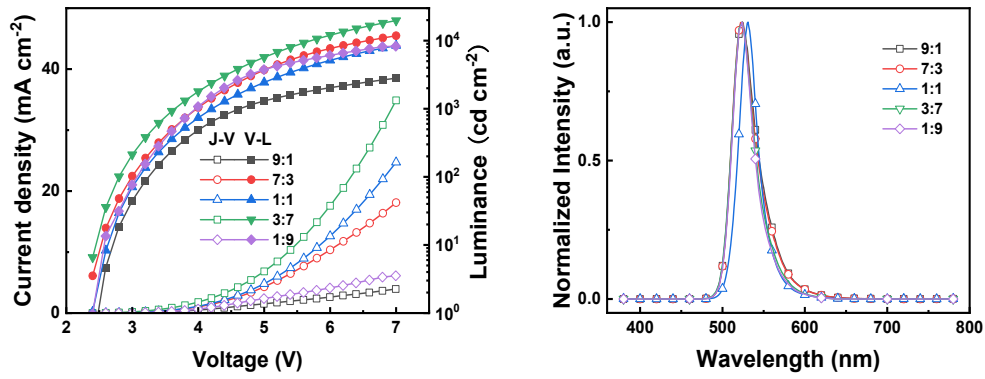

(c)

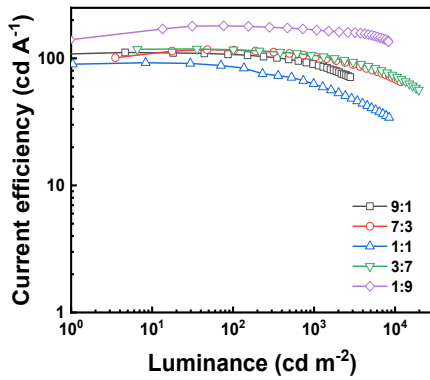

**Figure S4.** Device performance of the Ex-Te OLEDs based on Yb:Ag cathode with different volume ratios. **(a)** Current density and luminance vs voltage, **(b)** normalized EL spectra and **(c)** current efficiency vs luminance

**Table S2.** Device characteristics of the fabricated Ex-Te OLEDs based on Yb:Ag cathode with different volume ratios.

| Ratio | $V_{on}^a$ (V) | Maximum CE (cd/A) | EL Peak (nm) | FWHM (nm) |
|-------|----------------|-------------------|--------------|-----------|
| 9:1   | 2.6            | 111.3             | 524          | 35        |
| 7:3   | 2.4            | 116.9             | 524          | 32        |
| 1:1   | 2.4            | 92.4              | 524          | 32        |
| 3:7   | 2.4            | 118.6             | 524          | 30        |
| 1:9   | 2.4            | 180.2             | 531          | 26        |

a) The voltage at the luminance of  $1 \text{ cd m}^{-2}$ .

(a)

(b)

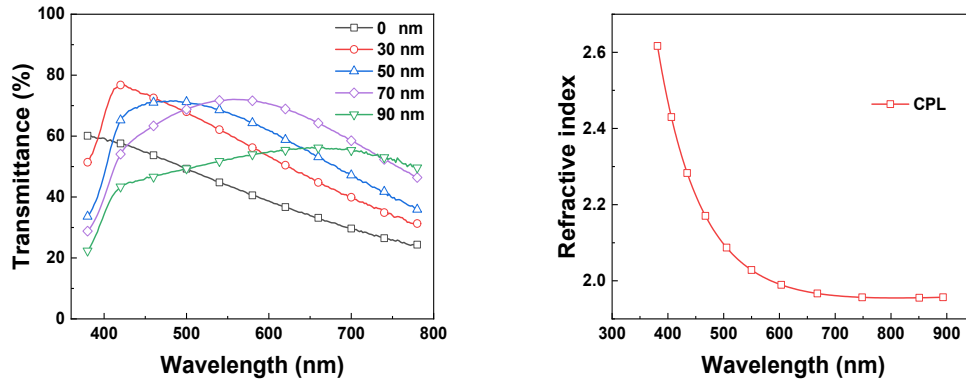

**Figure S5. (a)** Transmittance of the co-deposited Yb:Ag alloy with different thicknesses of capping layer. **(b)** Refractive index of the CPL layer.

**Table S3.** Summary showing the transmittance of Yb:Ag alloy with different thicknesses of CPL.

| Thickness (nm) | Transmittance @ 524 nm (%) |
|----------------|----------------------------|
| 0              | 46.6                       |
| 30             | 64.4                       |
| 50             | 69.8                       |
| 70             | 70.9                       |
| 90             | 50.7                       |

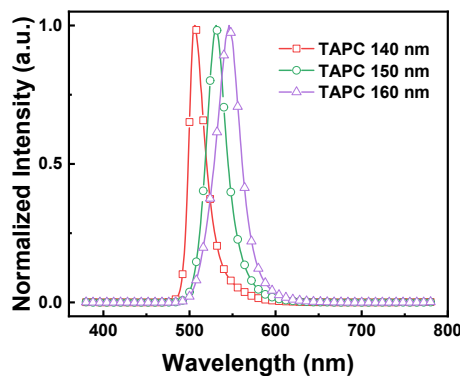

**Figure S6.** Normalized EL spectra of the Ex-Te devices with TAPC thickness of 140, 150 and 160 nm, from which the emission peak/FWHM are 506/21, 531/26 and 546/33 nm, respectively.
